# Supplementary material for: Regional-Scale Paleoproterozoic Heating Event on Archean Acasta Gneisses in Slave Province, Canada: Insights from K–Ar and 40Ar/39Ar Chronology
Source: MDPI journal article supplement (doi:10.3390/min14040397), 2024-04-12
Supplement: s1 [file s1]

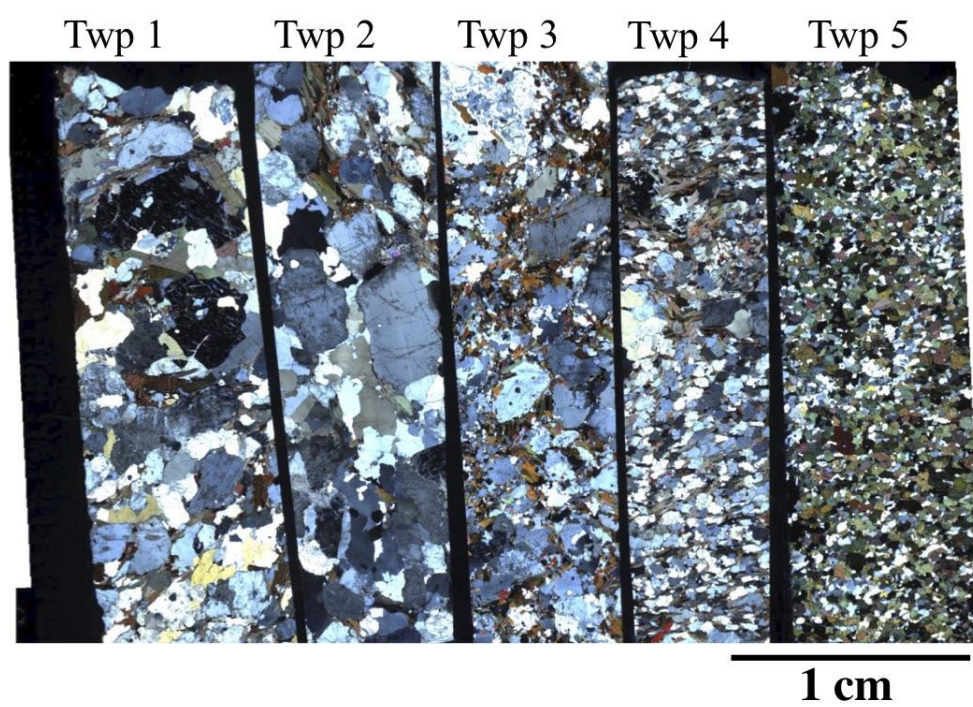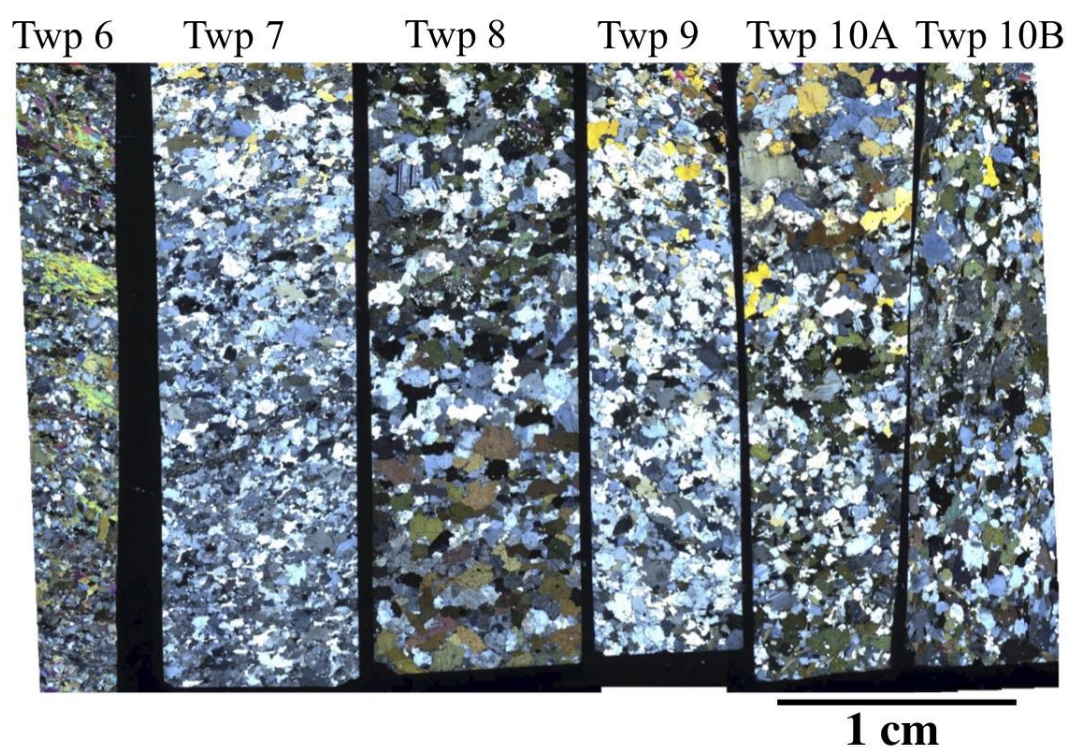



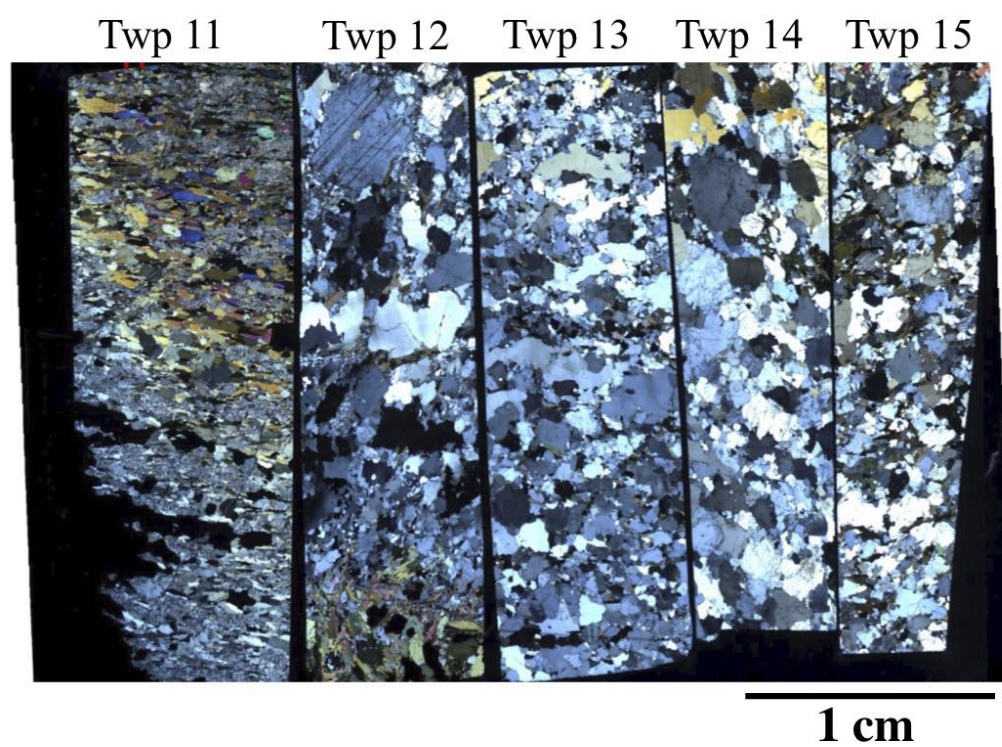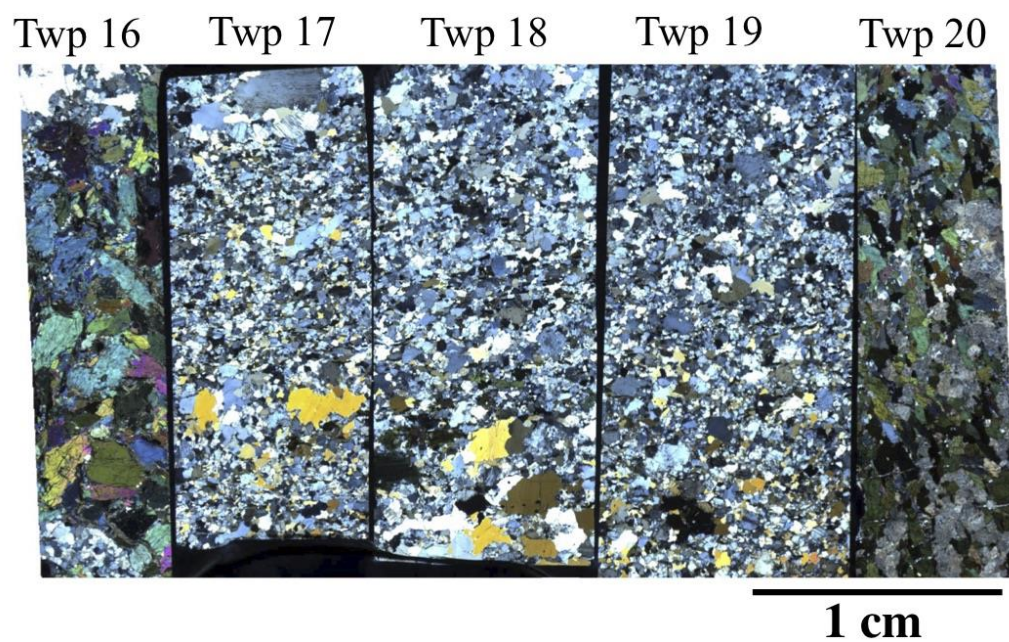



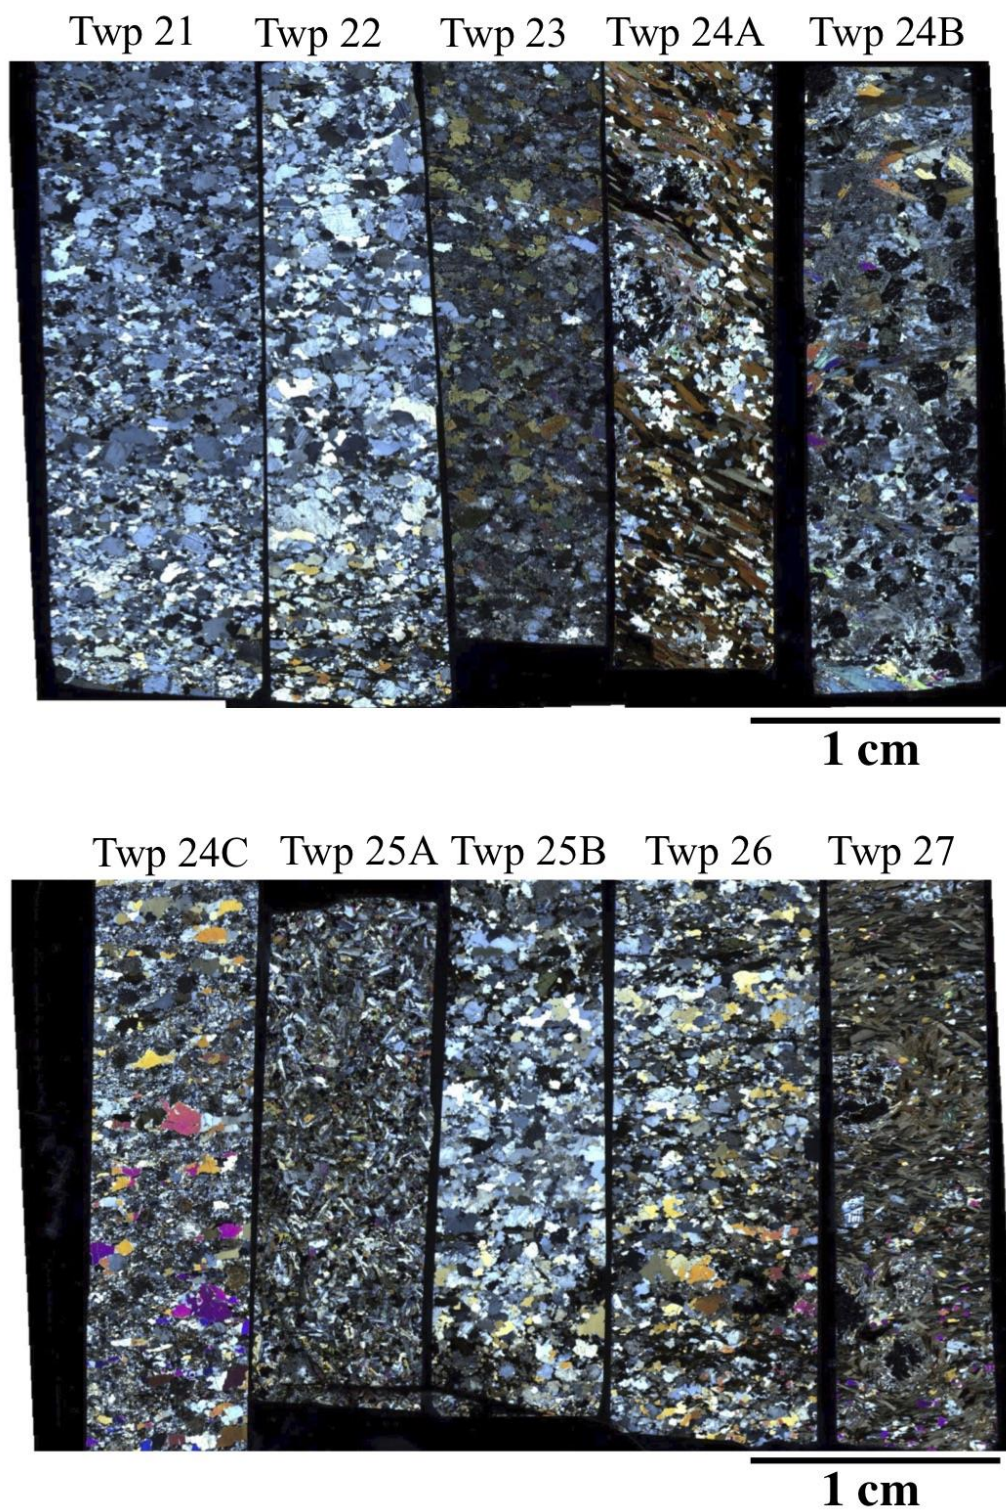

**Figure S1.** Photomicrographs (crossed polars) of the Wopmay rocks (Twp 1–4) and the Acasta gneisses (Twp 5–27). These all are the composite photograph using multi photos.
